# Supplementary material for: Rhizostomins: A Novel Pigment Family From Rhizostome Jellyfish (Cnidaria, Scyphozoa)
Source: Frontiers journal article supplement (doi:10.3389/fmars.2021.752949), 2021-09-24
Supplement: Data_Sheet_1.zip [file Data_Sheet_1.zip]

## Sheet: Supplementary Table 3
Supplementary Table 3. Structural prediction of rpulFKz1 and its Fz-CRD and KR domain-containing homologues. Sequence IDs are presented in the same order as they appear in Fig. 3. For details on metrics presented see Yang et al. (2015).
Sequence ID	Best predicted model			Closest structural analog
	C-score	Estimated TM-score	Estimated RMSD (Å)	PDB Hit	TM-score	RMSD (Å)	Identity (%)	Coverage (%)
Cassiopea_Cxam_g22103.t1	-1.86	0.49 ± 0.15	10.2 ± 4.6	4durA - Type II human plasminogen, chain A	0.802	2.59	19.8	90.5
Nemopilema_GHAR01043928.1.p1	-2.31	0.44 ± 0.14	11.3 ± 4.5	4durA - Type II human plasminogen, chain A	0.79	2.9	19.3	89.8
Nemopilema_GHAR01040358.1.p1	-2.5	0.42 ± 0.14	11.7 ± 4.5	4durA - Type II human plasminogen, chain A	0.865	2.02	22.1	94.2
Nemopilema_GHAR01036858.1.p1	-3.48	0.33 ± 0.11	14.3 ± 3.8	3hn4A - NK2 fragment of human hepatocyte growth factor, chain A	0.667	2.82	25.9	76.7
Rhopilema_mRNA.RE15725	-2.6	0.41 ± 0.14	12 ± 4.4	1ki0A - Human angiostatin, chain A	0.743	1.56	27.2	78.6
Rhopilema_mRNA.RE16034	-1.29	0.55 ± 0.15	9.1 ± 4.6	4durA - Type II human plasminogen, chain A	0.837	2.97	19.3	94.1
Rhopilema_mRNA.RE16087	-1.6	0.52 ± 0.15	9.6 ± 4.6	4durA - Type II human plasminogen, chain A	0.826	2.18	23.7	90.2
Stomolophus_TRINITY_DN160_c0_g1_i1.p1	-2.99	0.38 ± 0.13	13 ± 4.2	1ki0A - Human angiostatin, chain A	0.716	1.85	25	77
Rhizostoma_AAS83462.1	-1.03	0.58 ± 0.14	8.2 ± 4.5	4durA - Type II human plasminogen, chain A	0.913	2.07	23.2	98.1
