# Supplementary material for: Rhizostomins: A Novel Pigment Family From Rhizostome Jellyfish (Cnidaria, Scyphozoa)
Source: Frontiers journal article supplement (doi:10.3389/fmars.2021.752949), 2021-09-24
Supplement: Table_2.XLSX [file Table_2.XLSX]

## Sheet: Supplementary Table 2
Supplementary Table 2. Sequence identity between Cassiopea xamachana blue pigment tryptic digests (Phelan et al., 2006) and rpulFKz1 homologue. Digests appear in the same order as in Fig. 4, which illustrates the alignment.
Digest sequence ID	Digest length	Number of matching amino acids	Percentage identity
Phelan673	6	5	83.3333
Phelan771	5	3	60
Phelan880	7	6	85.7143
Phelan948	6	4	66.6667
Phelan958	3	2	66.6667
Phelan991	8	5	62.5
Phelan995	7	7	100
Phelan1039	7	5	71.4286
Phelan1053	7	7	100
Phelan1134	4	4	100
Phelan1177	10	8	80
Phelan1204	11	8	72.7273
Phelan1283	7	4	57.1429
Phelan1578	4	3	75
Phelan1612	6	6	100
Phelan1717	6	4	66.6667
Phelan2053	6	5	83.3333
Phelan2162	15	12	80
		Average percentage identity	78.3989
		Standard deviation	14.3939
